# Supplementary material for: London Calls? Discrimination of European Job Seekers in the Aftermath of the Brexit Referendum
Source: Frontiers journal article supplement (doi:10.3389/fsoc.2021.737857), 2021-12-22
Supplement: Table_1.pdf [file Table_1.pdf]

## APPENDIX

**Table A1. Names and surnames randomly assigned to the job applications.**

| National origin signaled in job applications as: |                  |                    |                    |                                 |
|--------------------------------------------------|------------------|--------------------|--------------------|---------------------------------|
| National origin                                  | Male first names | Female first names | Surnames           | Language skills                 |
| Bulgaria                                         | Zlatan           | Nevena             | Dimitrov/a         | Bilingual English and Bulgarian |
| France                                           | Guillaume        | Claire             | Durand             | Bilingual English and French    |
| Germany                                          | Paul             | Lisa               | Schneider          | Bilingual English and German    |
| Greece                                           | Giorgos          | Konstantina        | Papadopoulos/u     | Bilingual English and Greek     |
| Ireland                                          | Erin             | Brendan            | O'Brien            | English                         |
| Italy                                            | Francesco        | Valentina          | Marino             | Bilingual English and Italian   |
| Netherlands                                      | Jeroen           | Maaïke             | De Vries           | Bilingual English and Dutch     |
| Poland                                           | Marek            | Michalina          | Kowalski           | Bilingual English and Polish    |
| Romania                                          | Andrei           | Dana               | Popescu            | Bilingual English and Romanian  |
| Spain                                            | Alvaro           | Alba               | Martínez<br>García | Bilingual English and Spanish   |
| United Kingdom                                   | James            | Emily              | Robinson           | English                         |

**Table A2. Discrimination of European applicants (any interest from employers). Full table.**

|                                  | M1                 | M2                 | M3                 | M4                 | M5                 |
|----------------------------------|--------------------|--------------------|--------------------|--------------------|--------------------|
| EU-country origin                | -.043*<br>(.026)   | -.085***<br>(.031) | -.083***<br>(.031) | -.079**<br>(.031)  | -.079**<br>(.031)  |
| <i>Occupation (ref. cook)</i>    |                    |                    |                    |                    |                    |
| Payroll clerk                    | -.268***<br>(.045) | -.26***<br>(.045)  | -.268***<br>(.045) | -.23***<br>(.051)  | -.229***<br>(.051) |
| Receptionist                     | -.256***<br>(.050) | -.254***<br>(.050) | -.266***<br>(.049) | -.216***<br>(.056) | -.216***<br>(.056) |
| Sales representative             | -.211***<br>(.050) | -.212***<br>(.050) | -.213***<br>(.050) | -.187***<br>(.052) | -.188***<br>(.053) |
| Software developer               | -.067<br>(.055)    | -.064<br>(.055)    | -.06<br>(.055)     | -.054<br>(.056)    | -.054<br>(.056)    |
| Store assistant                  | -.172***<br>(.052) | -.173***<br>(.053) | -.175***<br>(.053) | -.144***<br>(.055) | -.144***<br>(.056) |
| <i>Contract (ref. full time)</i> |                    |                    |                    |                    |                    |
| Part time                        | -.065<br>(.040)    | -.061<br>(.041)    | -.058<br>(.040)    | -.066<br>(.040)    | -.066<br>(.041)    |
| Flexible                         | .001<br>(.056)     | -.001<br>(.056)    | .004<br>(.055)     | .017<br>(.055)     | .016<br>(.055)     |
| Not specified                    | -.036<br>(.045)    | -.034<br>(.044)    | -.037<br>(.044)    | -.031<br>(.045)    | -.029<br>(.045)    |
| <i>Other treatments:</i>         |                    |                    |                    |                    |                    |
| First generation                 |                    | .077*<br>(.041)    | .075*<br>(.041)    | .071*<br>(.041)    | .072*<br>(.041)    |
| Female                           |                    | .056**<br>(.025)   | .06**<br>(.025)    | .058**<br>(.025)   | .058**<br>(.025)   |
| Higher grade                     |                    | -.038<br>(.025)    | -.033<br>(.025)    | -.033<br>(.025)    | -.033<br>(.025)    |
| Performance signal               |                    | .030<br>(.025)     | .029<br>(.025)     | .034<br>(.025)     | .034<br>(.025)     |
| Warmth signal                    |                    | -.015<br>(.025)    | -.013<br>(.025)    | -.012<br>(.025)    | -.013<br>(.025)    |
| Christian religion               |                    | -.019<br>(.025)    | -.022<br>(.025)    | -.022<br>(.025)    | -.022<br>(.025)    |
| <i>Nuts1 (ref. London)</i>       |                    |                    |                    |                    |                    |
| North East England               |                    |                    | .056<br>(.094)     | .004<br>(.095)     | .002<br>(.095)     |
| North West England               |                    |                    | -.12***<br>(.045)  | -.142***<br>(.047) | -.143***<br>(.047) |
| Yorkshire Humber                 |                    |                    | -.080<br>(.056)    | -.101*<br>(.058)   | -.101*<br>(.058)   |
| East Midlands                    |                    |                    | -.062<br>(.057)    | -.084<br>(.06)     | -.084<br>(.06)     |
| West Midlands                    |                    |                    | -.067<br>(.057)    | -.109*<br>(.06)    | -.109*<br>(.06)    |
| East of England                  |                    |                    | -.076*<br>(.043)   | -.104**<br>(.045)  | -.104**<br>(.045)  |
| South East England               |                    |                    | -.032<br>(.038)    | -.058<br>(.041)    | -.058<br>(.041)    |
| South West England               |                    |                    | -.119**<br>(.046)  | -.154***<br>(.05)  | -.154***<br>(.05)  |

|                                                    |  |  |  |  |  |
|----------------------------------------------------|--|--|--|--|--|
| Wales                                              |  |  |  |  |  |
|                                                    |  |  |  |  |  |
|                                                    |  |  |  |  |  |
| Scotland                                           |  |  |  |  |  |
|                                                    |  |  |  |  |  |
|                                                    |  |  |  |  |  |
| <i>Average daily competition (ref. &lt;1)</i>      |  |  |  |  |  |
| 1 to 2                                             |  |  |  |  |  |
|                                                    |  |  |  |  |  |
| 2 to 5                                             |  |  |  |  |  |
|                                                    |  |  |  |  |  |
| 5 to 10                                            |  |  |  |  |  |
|                                                    |  |  |  |  |  |
| More than 10                                       |  |  |  |  |  |
|                                                    |  |  |  |  |  |
| <i>Time dummies (ref. 1<sup>st</sup> semester)</i> |  |  |  |  |  |
| 2 <sup>nd</sup> semester                           |  |  |  |  |  |
|                                                    |  |  |  |  |  |
| 3 <sup>rd</sup> semester                           |  |  |  |  |  |
|                                                    |  |  |  |  |  |
| Constant                                           |  |  |  |  |  |
|                                                    |  |  |  |  |  |
| N applicants                                       |  |  |  |  |  |
| R-squared                                          |  |  |  |  |  |

*Robust standard errors are in parentheses.*

\*\*\*  $p < .01$ , \*\*  $p < .05$ , \*  $p < .1$

Source: GEMM data, own calculations.

Dependent variable: any interest from employers.

EU countries include: Bulgaria, France, Germany, Greece, Ireland, Italy, Netherlands, Poland, Romania, Spain.

**Table A3. Discrimination of European applicants (any interest from employers): a comparison of EU12 and Eastern European migrants. Full table.**

|                                    | M1                 | M2                 | M3                 | M4                 | M5                 |
|------------------------------------|--------------------|--------------------|--------------------|--------------------|--------------------|
| <i>Origin (Ref. White British)</i> |                    |                    |                    |                    |                    |
| EU12 origin                        | -.037<br>(.028)    | -.076**<br>(.032)  | -.076**<br>(.032)  | -.074**<br>(.033)  | -.074**<br>(.033)  |
| Eastern EU origin                  | -.063<br>(.042)    | -.112**<br>(.049)  | -.105**<br>(.049)  | -.096**<br>(.049)  | -.097**<br>(.049)  |
| <i>Occupation (ref. cook)</i>      |                    |                    |                    |                    |                    |
| Payroll clerk                      | -.269***<br>(.045) | -.261***<br>(.045) | -.268***<br>(.045) | -.231***<br>(.051) | -.23***<br>(.051)  |
| Receptionist                       | -.257***<br>(.05)  | -.256***<br>(.05)  | -.267***<br>(.05)  | -.217***<br>(.056) | -.217***<br>(.056) |
| Sales representative               | -.212***<br>(.05)  | -.213***<br>(.05)  | -.214***<br>(.05)  | -.188***<br>(.052) | -.189***<br>(.053) |
| Software developer                 | -.067<br>(.055)    | -.064<br>(.055)    | -.06<br>(.055)     | -.054<br>(.056)    | -.054<br>(.056)    |
| Store assistant                    | -.172***<br>(.052) | -.173***<br>(.053) | -.175***<br>(.053) | -.144***<br>(.055) | -.144***<br>(.056) |
| <i>Contract (ref. full time)</i>   |                    |                    |                    |                    |                    |
| Part time                          | -.065<br>(.04)     | -.061<br>(.041)    | -.058<br>(.04)     | -.066<br>(.04)     | -.066<br>(.041)    |
| Flexible                           | .001<br>(.056)     | 0<br>(.056)        | .005<br>(.055)     | .017<br>(.056)     | .017<br>(.055)     |
| Not specified                      | -.036<br>(.045)    | -.034<br>(.044)    | -.037<br>(.044)    | -.031<br>(.045)    | -.029<br>(.045)    |
| <i>Other treatments:</i>           |                    |                    |                    |                    |                    |
| First generation                   |                    | .079*<br>(.041)    | .077*<br>(.041)    | .072*<br>(.041)    | .073*<br>(.041)    |
| Female                             |                    | .056**<br>(.025)   | .060**<br>(.025)   | .058**<br>(.025)   | .058**<br>(.025)   |
| Higher grade                       |                    | -.039<br>(.025)    | -.034<br>(.025)    | -.034<br>(.025)    | -.033<br>(.025)    |
| Performance signal                 |                    | .029<br>(.025)     | .029<br>(.025)     | .033<br>(.025)     | .034<br>(.025)     |
| Warmth signal                      |                    | -.015<br>(.025)    | -.013<br>(.025)    | -.012<br>(.025)    | -.013<br>(.025)    |
| Christian religion                 |                    | -.019<br>(.025)    | -.022<br>(.025)    | -.022<br>(.025)    | -.022<br>(.025)    |
| <i>Nuts1 (ref. London)</i>         |                    |                    |                    |                    |                    |
| North East England                 |                    |                    | .055<br>(.095)     | .004<br>(.095)     | .001<br>(.095)     |
| North West England                 |                    |                    | -.120***<br>(.045) | -.143***<br>(.047) | -.143***<br>(.047) |
| Yorkshire Humber                   |                    |                    | -.079<br>(.056)    | -.099*<br>(.058)   | -.1*<br>(.058)     |
| East Midlands                      |                    |                    | -.063<br>(.057)    | -.084<br>(.06)     | -.085<br>(.06)     |
| West Midlands                      |                    |                    | -.065<br>(.057)    | -.107*<br>(.06)    | -.107*<br>(.06)    |
| East of England                    |                    |                    | -.076*<br>(.057)   | -.104**<br>(.06)   | -.104**<br>(.06)   |

|                                                    |         |         |          |          |          |
|----------------------------------------------------|---------|---------|----------|----------|----------|
|                                                    |         |         | (.043)   | (.045)   | (.045)   |
| South East England                                 |         |         | -.032    | -.059    | -.058    |
|                                                    |         |         | (.038)   | (.041)   | (.041)   |
| South West England                                 |         |         | -.118**  | -.153*** | -.153*** |
|                                                    |         |         | (.046)   | (.050)   | (.050)   |
| Wales                                              |         |         | -.042    | -.044    | -.043    |
|                                                    |         |         | (.134)   | (.147)   | (.147)   |
| Scotland                                           |         |         | -.294*** | -.305*** | -.302*** |
|                                                    |         |         | (.083)   | (.084)   | (.085)   |
| <i>Average daily competition (ref. &lt;1)</i>      |         |         |          |          |          |
| 1 to 2                                             |         |         |          | -.033    | -.033    |
|                                                    |         |         |          | (.031)   | (.031)   |
| 2 to 5                                             |         |         |          | -.041    | -.040    |
|                                                    |         |         |          | (.045)   | (.045)   |
| 5 to 10                                            |         |         |          | -.057    | -.056    |
|                                                    |         |         |          | (.049)   | (.049)   |
| More than 10                                       |         |         |          | -.140**  | -.139**  |
|                                                    |         |         |          | (.056)   | (.056)   |
| <i>Time dummies (ref. 1<sup>st</sup> semester)</i> |         |         |          |          |          |
| 2 <sup>nd</sup> semester                           |         |         |          |          | -.011    |
|                                                    |         |         |          |          | (.037)   |
| 3 <sup>rd</sup> semester                           |         |         |          |          | -.013    |
|                                                    |         |         |          |          | (.036)   |
| Constant                                           | .432*** | .426*** | .477***  | .490***  | .500***  |
|                                                    | (.042)  | (.051)  | (.055)   | (.058)   | (.063)   |
| N applicants                                       | 1111    | 1111    | 1111     | 1096     | 1096     |
| R-squared                                          | .060    | .071    | .083     | .086     | .086     |

*Robust standard errors are in parentheses*

\*\*\*  $p < .01$ , \*\*  $p < .05$ , \*  $p < .1$

Source: GEMM data, own calculations.

Dependent variable: any interest from employers.

EU12 countries: France, Germany, Greece, Ireland, Italy, Netherlands, Spain.

Eastern EU countries: Bulgaria, Poland, Romania.

**Table A4. Discrimination of European applicants (invitation to interview). Full table.**

|                                  | M1                 | M2                 | M3                 | M4                 | M5                 |
|----------------------------------|--------------------|--------------------|--------------------|--------------------|--------------------|
| EU-country origin                | -.017<br>(.021)    | -.057**<br>(.024)  | -.055**<br>(.024)  | -.056**<br>(.024)  | -.06**<br>(.024)   |
| <i>Occupation (ref. cook)</i>    |                    |                    |                    |                    |                    |
| Payroll clerk                    | -.152***<br>(.038) | -.148***<br>(.038) | -.156***<br>(.038) | -.136***<br>(.043) | -.138***<br>(.043) |
| Receptionist                     | -.141***<br>(.042) | -.14***<br>(.042)  | -.16***<br>(.041)  | -.13***<br>(.046)  | -.134***<br>(.046) |
| Sales representative             | -.134***<br>(.042) | -.134***<br>(.042) | -.137***<br>(.041) | -.128***<br>(.043) | -.126***<br>(.043) |
| Software developer               | -.088**<br>(.045)  | -.089**<br>(.045)  | -.089**<br>(.044)  | -.086*<br>(.045)   | -.086*<br>(.045)   |
| Store assistant                  | -.085*<br>(.045)   | -.086*<br>(.045)   | -.088**<br>(.044)  | -.075<br>(.046)    | -.078*<br>(.046)   |
| <i>Contract (ref. full time)</i> |                    |                    |                    |                    |                    |
| Part time                        | -.063**<br>(.028)  | -.063**<br>(.028)  | -.06**<br>(.028)   | -.073***<br>(.027) | -.074***<br>(.027) |
| Flexible                         | -.020<br>(.045)    | -.018<br>(.045)    | -.012<br>(.044)    | -.005<br>(.044)    | -.008<br>(.044)    |
| Not specified                    | -.065**<br>(.03)   | -.064**<br>(.03)   | -.07**<br>(.03)    | -.069**<br>(.03)   | -.056*<br>(.031)   |
| <i>Other treatments:</i>         |                    |                    |                    |                    |                    |
| First generation                 |                    | .077**<br>(.033)   | .071**<br>(.033)   | .073**<br>(.033)   | .077**<br>(.033)   |
| Female                           |                    | .012<br>(.02)      | .016<br>(.02)      | .011<br>(.02)      | .012<br>(.02)      |
| Higher grade                     |                    | -.039*<br>(.02)    | -.032<br>(.02)     | -.03<br>(.02)      | -.027<br>(.02)     |
| Performance signal               |                    | .017<br>(.02)      | .016<br>(.02)      | .018<br>(.02)      | .019<br>(.02)      |
| Warmth signal                    |                    | -.008<br>(.02)     | -.007<br>(.02)     | -.009<br>(.02)     | -.013<br>(.02)     |
| Christian religion               |                    | -.014<br>(.02)     | -.015<br>(.02)     | -.014<br>(.02)     | -.015<br>(.02)     |
| <i>Nuts1 (ref. London)</i>       |                    |                    |                    |                    |                    |
| North East England               |                    |                    | .083<br>(.092)     | .028<br>(.092)     | .015<br>(.091)     |
| North West England               |                    |                    | -.134***<br>(.035) | -.157***<br>(.038) | -.159***<br>(.037) |
| Yorkshire Humber                 |                    |                    | -.162***<br>(.037) | -.183***<br>(.039) | -.183***<br>(.039) |
| East Midlands                    |                    |                    | -.074<br>(.049)    | -.097*<br>(.052)   | -.098*<br>(.052)   |
| West Midlands                    |                    |                    | -.095**<br>(.046)  | -.108**<br>(.05)   | -.109**<br>(.049)  |
| East of England                  |                    |                    | -.086**<br>(.037)  | -.106***<br>(.039) | -.103***<br>(.039) |
| South East England               |                    |                    | -.099***<br>(.031) | -.126***<br>(.034) | -.125***<br>(.034) |
| South West England               |                    |                    | -.148***<br>(.035) | -.182***<br>(.038) | -.177***<br>(.038) |

|                                                    |  |  |  |  |  |
|----------------------------------------------------|--|--|--|--|--|
| Wales                                              |  |  |  |  |  |
|                                                    |  |  |  |  |  |
|                                                    |  |  |  |  |  |
| Scotland                                           |  |  |  |  |  |
|                                                    |  |  |  |  |  |
|                                                    |  |  |  |  |  |
| <i>Average daily competition (ref. &lt;1)</i>      |  |  |  |  |  |
| 1 to 2                                             |  |  |  |  |  |
|                                                    |  |  |  |  |  |
| 2 to 5                                             |  |  |  |  |  |
|                                                    |  |  |  |  |  |
| 5 to 10                                            |  |  |  |  |  |
|                                                    |  |  |  |  |  |
| More than 10                                       |  |  |  |  |  |
|                                                    |  |  |  |  |  |
| <i>Time dummies (ref. 1<sup>st</sup> semester)</i> |  |  |  |  |  |
| 2 <sup>nd</sup> semester                           |  |  |  |  |  |
|                                                    |  |  |  |  |  |
| 3 <sup>rd</sup> semester                           |  |  |  |  |  |
|                                                    |  |  |  |  |  |
| Constant                                           |  |  |  |  |  |
|                                                    |  |  |  |  |  |
| N applicants                                       |  |  |  |  |  |
| R-squared                                          |  |  |  |  |  |

*Robust standard errors are in parentheses*

\*\*\*  $p < .01$ , \*\*  $p < .05$ , \*  $p < .1$

Source: GEMM data, own calculations.

Dependent variable: invitation to interview.

EU countries: Bulgaria, France, Germany, Greece, Ireland, Italy, Netherlands, Poland, Romania, Spain.

**Table A5. Discrimination of European applicants (invitation to interview): a comparison of EU12 and Eastern European migrants. Full table.**

|                                    | M1                 | M2                 | M3                 | M4                 | M5                 |
|------------------------------------|--------------------|--------------------|--------------------|--------------------|--------------------|
| <i>Origin (Ref. White British)</i> |                    |                    |                    |                    |                    |
| EU12 origin                        | -.019<br>(.023)    | -.057**<br>(.025)  | -.057**<br>(.025)  | -.059**<br>(.025)  | -.064***<br>(.024) |
| Eastern EU origin                  | -.012<br>(.036)    | -.058<br>(.04)     | -.049<br>(.04)     | -.047<br>(.04)     | -.049<br>(.039)    |
| <i>Occupation (ref. cook)</i>      |                    |                    |                    |                    |                    |
| Payroll clerk                      | -.152***<br>(.038) | -.148***<br>(.038) | -.156***<br>(.038) | -.136***<br>(.043) | -.138***<br>(.043) |
| Receptionist                       | -.141***<br>(.042) | -.14***<br>(.042)  | -.159***<br>(.041) | -.129***<br>(.046) | -.134***<br>(.046) |
| Sales representative               | -.134***<br>(.042) | -.134***<br>(.042) | -.136***<br>(.041) | -.128***<br>(.043) | -.125***<br>(.043) |
| Software developer                 | -.088**<br>(.045)  | -.089**<br>(.045)  | -.089**<br>(.044)  | -.086*<br>(.045)   | -.085*<br>(.045)   |
| Store assistant                    | -.085*<br>(.045)   | -.086*<br>(.045)   | -.088**<br>(.044)  | -.075<br>(.046)    | -.078*<br>(.046)   |
| <i>Contract (ref. full time)</i>   |                    |                    |                    |                    |                    |
| Part time                          | -.064**<br>(.028)  | -.063**<br>(.028)  | -.06**<br>(.028)   | -.073***<br>(.027) | -.074***<br>(.027) |
| Flexible                           | -.02<br>(.045)     | -.018<br>(.045)    | -.012<br>(.044)    | -.005<br>(.044)    | -.008<br>(.044)    |
| Not specified                      | -.065**<br>(.03)   | -.064**<br>(.03)   | -.07**<br>(.03)    | -.069**<br>(.03)   | -.056*<br>(.031)   |
| <i>Other treatments:</i>           |                    |                    |                    |                    |                    |
| First generation                   |                    | .077**<br>(.033)   | .071**<br>(.034)   | .073**<br>(.034)   | .076**<br>(.033)   |
| Female                             |                    | .012<br>(.02)      | .016<br>(.02)      | .01<br>(.02)       | .011<br>(.02)      |
| Higher grade                       |                    | -.039*<br>(.02)    | -.032<br>(.02)     | -.03<br>(.02)      | -.027<br>(.02)     |
| Performance signal                 |                    | .017<br>(.02)      | .016<br>(.02)      | .018<br>(.02)      | .019<br>(.02)      |
| Warmth signal                      |                    | -.008<br>(.02)     | -.007<br>(.02)     | -.009<br>(.02)     | -.013<br>(.02)     |
| Christian religion                 |                    | -.014<br>(.02)     | -.015<br>(.02)     | -.014<br>(.02)     | -.015<br>(.02)     |
| <i>Nuts1 (ref. London)</i>         |                    |                    |                    |                    |                    |
| North East England                 |                    |                    | .083<br>(.092)     | .028<br>(.092)     | .016<br>(.091)     |
| North West England                 |                    |                    | -.134***<br>(.035) | -.157***<br>(.038) | -.158***<br>(.037) |
| Yorkshire Humber                   |                    |                    | -.162***<br>(.037) | -.184***<br>(.039) | -.184***<br>(.039) |
| East Midlands                      |                    |                    | -.074<br>(.049)    | -.097*<br>(.052)   | -.098*<br>(.052)   |
| West Midlands                      |                    |                    | -.095**<br>(.046)  | -.109**<br>(.049)  | -.11**<br>(.049)   |
| East of England                    |                    |                    | -.086**<br>(.037)  | -.106***<br>(.039) | -.103***<br>(.039) |
| South East England                 |                    |                    | -.099***           | -.126***           | -.124***           |



|                                                    |         |          |          |          |
|----------------------------------------------------|---------|----------|----------|----------|
|                                                    |         | (.031)   | (.034)   | (.034)   |
| South West England                                 |         | -.148*** | -.182*** | -.178*** |
|                                                    |         | (.035)   | (.038)   | (.038)   |
| Wales                                              |         | -.204*** | -.234*** | -.22***  |
|                                                    |         | (.037)   | (.042)   | (.042)   |
| Scotland                                           |         | -.213*** | -.235*** | -.22***  |
|                                                    |         | (.051)   | (.052)   | (.053)   |
| <i>Average daily competition (ref. &lt;1)</i>      |         |          |          |          |
| 1 to 2                                             |         |          | -.008    | -.005    |
|                                                    |         |          | (.025)   | (.025)   |
| 2 to 5                                             |         |          | -.032    | -.027    |
|                                                    |         |          | (.035)   | (.035)   |
| 5 to 10                                            |         |          | -.004    | .002     |
|                                                    |         |          | (.045)   | (.045)   |
| More than 10                                       |         |          | -.146*** | -.134*** |
|                                                    |         |          | (.044)   | (.044)   |
| <i>Time dummies (ref. 1<sup>st</sup> semester)</i> |         |          |          |          |
| 2 <sup>nd</sup> semester                           |         |          |          | -.084*** |
|                                                    |         |          |          | (.031)   |
| 3 <sup>rd</sup> semester                           |         |          |          | -.067**  |
|                                                    |         |          |          | (.031)   |
| Constant                                           | .253*** | .27***   | .351***  | .37***   |
|                                                    | (.037)  | (.043)   | (.047)   | (.049)   |
| N applicants                                       | 1111    | 1111     | 1111     | 1096     |
| R-squared                                          | .030    | .039     | .071     | .078     |
|                                                    |         |          |          | .086     |

*Robust standard errors are in parentheses*

\*\*\*  $p < .01$ , \*\*  $p < .05$ , \*  $p < .1$

Source: GEMM data, own calculations.

Dependent variable: invitation to interview.

EU12 countries: France, Germany, Greece, Ireland, Italy, Netherlands, Spain.

Eastern EU countries: Bulgaria, Poland, Romania.

**Figure A1. Example of a CV and cover letter.**

## ***Marek Kowalski***

Address, London

**Mobile:** [mobile number] | **Email:** [email address]

### **Personal statement**

A qualified cook with over four years of experience, now looking for opportunities to further develop in the hospitality sector. A self-starter, able to work on own initiative and as part of a team.

### **Work Experience**

July 2014 - present

**Chef de Partie, *Hotel xxxx, London***

- Assisting the head chef in the day-to-day running of the kitchen
- Preparing and cooking meals
- Following recipes to meet restaurant's standards
- Strictly complying with food quality and temperature regulations
- Overseeing kitchen administration and stock management

September 2012 - June 2014

**Commis Chef, *xxxx Hospital, London***

- Washed, peeled and trimmed food for cold buffets and side dishes
- Ensured that all food served was arranged properly and met quality standards
- Checked and ordered stock from suppliers, unloaded deliveries and organized the storeroom
- Checked the temperature of the fridge and followed safety and hygiene protocols

### **Education**

2010-2012

*College of xxxx London*

**Level 2 Diploma in Professional Cookery (City & Guilds)**

2005-2010

*xxxx High School, xxxx, London*

### **Skills**

**Computer skills:** Microsoft Office, Outlook

**Training:** Essential Food Hygiene certificate, COSHH training

**Language skills:** *Bilingual English and Polish* | French (basic)

**Driving:** Full, clean UK driving license; in possession of own car

### **Volunteer work**

January 2014 - present

**Volunteer at Youth Enrichment Project**

Assisting with cooking and preparation of meals for various events like open days and local fairs.

### **References**

Available on request

Dear Sir or Madam,

I would like to apply for the position of [*job title*] which I have seen advertised on [*online job platform*]. I have worked for four years as a cook in kitchens and dining facilities. I like my current job but I am seeking new challenges in a role that would allow me to reach my full potential. I would be happy to relocate.

As a chef de partie at [*name of current employer*] I prepare, cook and serve meals to the highest standards required. Over the years I have improved my cooking skills with a la carte menu and also gained experience in buffets and catering. I understand the importance of health and safety regulations and basic food hygiene procedures. I always make sure that food is stored and chilled properly and that the kitchen and the equipment are kept clean.

I am very flexible and I am happy to work outside of regular working hours or at weekends. I can work well on my own but I also enjoy being in a team.

I am a passionate cook both in my professional life and in my spare time. This is shown through my volunteer work at my *local* community centre, where I help prepare meals for various events like local fairs and open days.

Thank you for taking the time to consider my application. I am keen to discuss my experience and skills with you in more detail. Note that although I have a *Polish* background all my education and training has been in Britain *since the age of 6*.

I look forward to hearing from you.

Yours faithfully,  
*Marek Kowalski*
